# Supplementary material
Source: PubMed Central journal article supplement (PMC7292579)
Supplement: mmc2.pdf [file mmc2.pdf]

# THE LANCET

## Digital Health

### Supplementary appendix 2

This appendix formed part of the original submission. We post it as supplied by the authors.

Supplement to: Maan H, Mbareche H, Raphenya AR, et al. Genotyping SARS-CoV-2 through an interactive web application. *Lancet Digital Health* 2020; published online June 12. [http://dx.doi.org/10.1016/S2589-7500\(20\)30140-0](http://dx.doi.org/10.1016/S2589-7500(20)30140-0).

## Supplementary Materials:

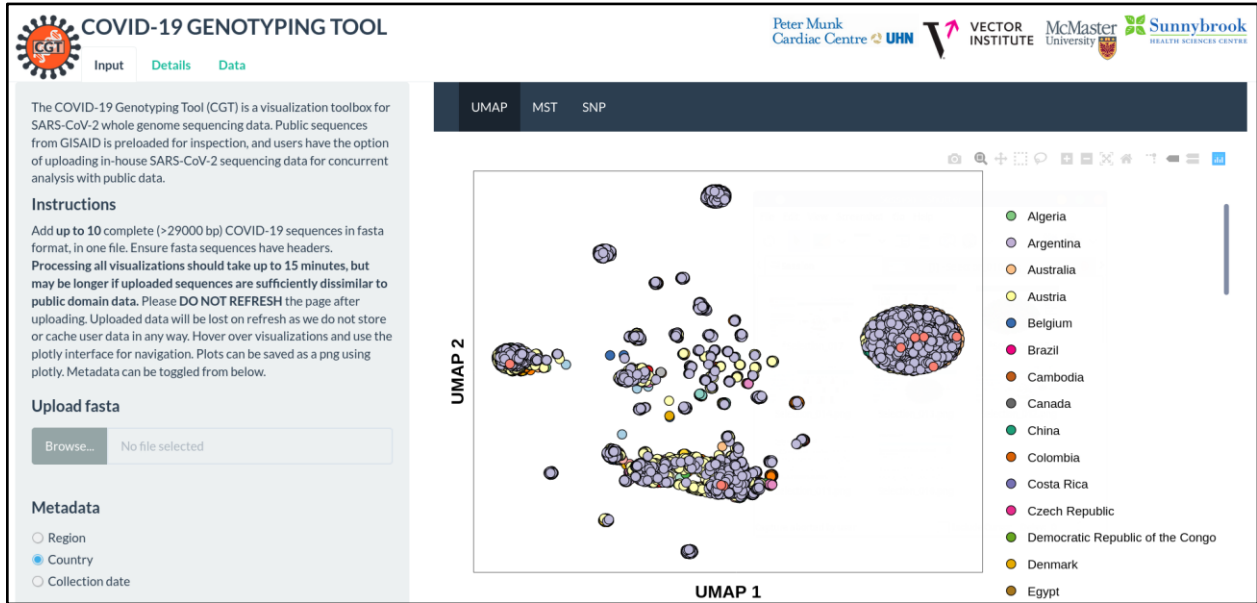

**Supplementary figure 1:** UMAP of GISAID sequences, labelled by country of origin.

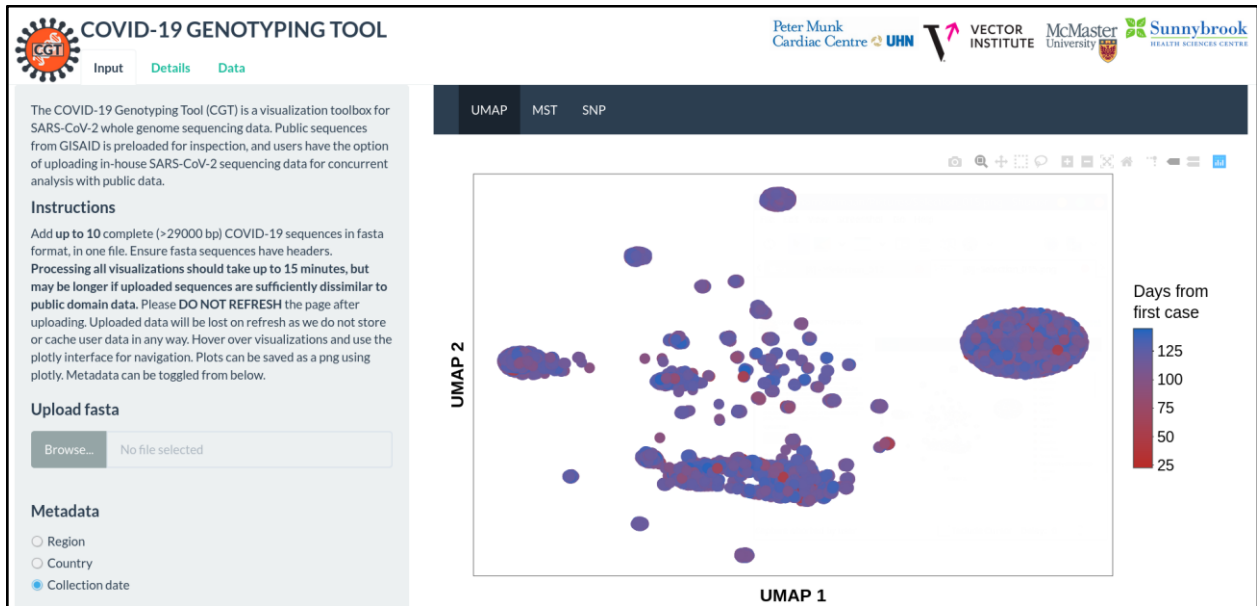

**Supplementary figure 2:** UMAP of GISAID sequences, labelled by collection date.
